# Supplementary material for: Ceragenins and Antimicrobial Peptides Kill Bacteria through Distinct Mechanisms
Source: PubMed Central journal article supplement (PMC8787472; doi:10.1128/mbio.02726-21), 2022-01-25
Supplement: mbio.02726-21-st001.pdf [file mbio.02726-21-st001.pdf]

**TABLE S1. Susceptibility of *E. coli*, *L. monocytogenes* and *Mycobacterium* spp. to antibiotics**

| Specie                  | Strain                 | MIC <sup>a</sup> (µg/mL) |       |            |        |       |        |            |
|-------------------------|------------------------|--------------------------|-------|------------|--------|-------|--------|------------|
|                         |                        | COL                      | LL37  | CSA13      | CSA131 | CSA44 | CSA144 | CIP        |
| <i>E. coli</i>          | MG1655                 | 0.25-1                   | 16-32 | 2-4        | 2-4    | 2-4   | 4-16   | 0.015      |
| <i>L. monocytogenes</i> | 10403S                 | 128- >128                | 32-64 | 1-2        | 1-2    | 2-4   | 4-8    | 1          |
| <i>M. avium</i>         | mc <sup>2</sup> 2500   | >128                     | >128  | 128- >128  | >128   | ND    | ND     | 0.5-2      |
|                         | mc <sup>2</sup> 2500D6 | >128                     | >128  | 32         | 64     | ND    | ND     | 0.125-0.25 |
| <i>M. marinum</i>       | M                      | >128                     | >128  | 32-128     | 64-128 | ND    | ND     | 0.25-1     |
| <i>M. smegmatis</i>     | mc <sup>2</sup> 155    | 64-128                   | >128  | 0.125-0.25 | 0.5    | 16-32 | 64-128 | 0.25       |
| <i>M. tuberculosis</i>  | Erdman                 | 128- >128                | >128  | 16         | 64     | ND    | ND     | 0.5        |

<sup>a</sup> COL, colistin; CIP, ciprofloxacin; ND, not determined.
