# Supplementary material for: Ceragenins and Antimicrobial Peptides Kill Bacteria through Distinct Mechanisms
Source: PubMed Central journal article supplement (PMC8787472; doi:10.1128/mbio.02726-21), 2022-01-25
Supplement: mbio.02726-21-st002.pdf [file mbio.02726-21-st002.pdf]

**TABLE S2. Comparison of the transcriptional and protein responses of *E. coli* exposed to colistin and CSA13 for selected genes<sup>a</sup>**

| Gene symbol                             | Protein             |                                |                     |                                | RNA                 |                                |                     |                                |
|-----------------------------------------|---------------------|--------------------------------|---------------------|--------------------------------|---------------------|--------------------------------|---------------------|--------------------------------|
|                                         | Colistin            |                                | CSA13               |                                | Colistin            |                                | CSA13               |                                |
|                                         | Log <sub>2</sub> FC | Adj. <i>P</i> <sub>value</sub> | Log <sub>2</sub> FC | Adj. <i>P</i> <sub>value</sub> | Log <sub>2</sub> FC | Adj. <i>P</i> <sub>value</sub> | Log <sub>2</sub> FC | Adj. <i>P</i> <sub>value</sub> |
| <b>CpxR regulon<sup>b</sup></b>         |                     |                                |                     |                                |                     |                                |                     |                                |
| <i>degP</i>                             | 1.81                | <0.05                          | 1.81                | <0.05                          | 4.36                | <0.05                          | 4.81                | <0.05                          |
| <i>spy</i>                              | 2.34                | <0.05                          | 1.50                | <0.05                          | 5.67                | <0.05                          | 5.96                | <0.05                          |
| <i>yebE</i>                             | 2.17                | <0.05                          | 3.29                | <0.05                          | 3.89                | <0.05                          | 5.70                | <0.05                          |
| <b>Colanic acid and LPS<sup>c</sup></b> |                     |                                |                     |                                |                     |                                |                     |                                |
| <i>cpsG</i>                             | 4.57                | <0.05                          | 0.96                | NS                             | 6.96                | <0.05                          | 0.91                | NS                             |
| <i>galU</i>                             | 1.03                | <0.05                          | -0.13               | NS                             | 1.71                | <0.05                          | -1.21               | <0.05                          |
| <i>gmd</i>                              | 6.96                | <0.05                          | ND                  | ND                             | 8.84                | <0.05                          | 2.35                | <0.05                          |
| <i>ugd</i>                              | 1.93                | <0.05                          | 0.06                | NS                             | 4.36                | <0.05                          | -1.03               | NS                             |
| <i>waaY</i>                             | 5.15                | <0.05                          | 5.91                | <0.05                          | 0.32                | NS                             | -0.80               | NS                             |
| <i>wcaG</i>                             | 3.84                | <0.05                          | ND                  | ND                             | 9.00                | <0.05                          | 1.76                | NS                             |
| <i>wcaJ</i>                             | 6.02                | <0.05                          | ND                  | ND                             | 7.44                | <0.05                          | 1.74                | NS                             |
| <i>wzc</i>                              | 1.36                | <0.05                          | -0.44               | NS                             | 8.52                | <0.05                          | 1.84                | NS                             |
| <b>PhoB regulon<sup>d</sup></b>         |                     |                                |                     |                                |                     |                                |                     |                                |
| <i>ompF</i>                             | 1.19                | NS                             | 2.88                | <0.05                          | -4.93               | <0.05                          | -4.33               | <0.05                          |
| <i>phoB</i>                             | -0.16               | NS                             | 1.37                | <0.05                          | -0.45               | NS                             | 4.31                | <0.05                          |
| <i>pstB</i>                             | 0.71                | <0.05                          | 1.55                | <0.05                          | 0.60                | NS                             | 4.21                | <0.05                          |
| <i>pstS</i>                             | -0.62               | NS                             | 1.60                | <0.05                          | 0.71                | NS                             | 5.77                | <0.05                          |
| <b>Heat response<sup>e</sup></b>        |                     |                                |                     |                                |                     |                                |                     |                                |
| <i>clpA</i>                             | 0.04                | NS                             | 1.03                | <0.05                          | 1.12                | <0.05                          | 2.90                | <0.05                          |
| <i>clpB</i>                             | 0.02                | NS                             | 1.30                | <0.05                          | 0.75                | NS                             | 4.57                | <0.05                          |
| <i>degP</i>                             | 1.81                | <0.05                          | 1.81                | <0.05                          | 4.36                | <0.05                          | 4.81                | <0.05                          |
| <i>hslU</i>                             | 0.31                | NS                             | 1.00                | <0.05                          | 0.39                | NS                             | 1.26                | <0.05                          |
| <i>hslV</i>                             | 0.08                | NS                             | 1.68                | <0.05                          | 0.33                | NS                             | 1.91                | <0.05                          |
| <i>htpG</i>                             | 0.28                | NS                             | 1.21                | <0.05                          | 0.30                | NS                             | 2.00                | <0.05                          |
| <i>ibpA</i>                             | 0.17                | NS                             | 3.14                | <0.05                          | -0.07               | NS                             | 5.02                | <0.05                          |
| <i>ibpB</i>                             | -0.09               | NS                             | 5.15                | <0.05                          | -0.22               | NS                             | 7.23                | <0.05                          |
| <i>lon</i>                              | 0.31                | NS                             | 1.05                | <0.05                          | 0.28                | NS                             | 1.26                | <0.05                          |
| <i>nudF</i>                             | 0.56                | NS                             | 1.12                | <0.05                          | -0.22               | NS                             | -0.40               | NS                             |
| <i>pspA</i>                             | 1.79                | <0.05                          | 1.81                | <0.05                          | 2.11                | <0.05                          | 5.36                | <0.05                          |
| <i>rhlE</i>                             | 0.30                | NS                             | 1.84                | <0.05                          | 0.88                | NS                             | -0.58               | NS                             |

<sup>a</sup> Log<sub>2</sub>FC, Log<sub>2</sub> fold change; Adj. *P*<sub>value</sub>, adjusted *P*<sub>value</sub>; ND, not determined; NS, not significant.

<sup>b</sup> CpxR regulon genes significantly upregulated at the protein level in *E. coli* exposed to colistin and CSA13.

<sup>c</sup> Genes involved in colanic acid (GO:0009242) and lipopolysaccharide (LPS) (GO:0009103) biosynthetic processes and significantly upregulated at the protein level in *E. coli* exposed to colistin.

<sup>d</sup> PhoB regulon genes significantly upregulated at the protein level in *E. coli* exposed to CSA13.

<sup>e</sup> Genes involved in the heat response (GO:0009408) and significantly upregulated at the protein level in *E. coli* exposed to CSA13.
