# Supplementary material for: Ceragenins and Antimicrobial Peptides Kill Bacteria through Distinct Mechanisms
Source: PubMed Central journal article supplement (PMC8787472; doi:10.1128/mbio.02726-21), 2022-01-25
Supplement: mbio.02726-21-st003.pdf [file mbio.02726-21-st003.pdf]

**TABLE S3. Transcriptional responses of *E. coli* exposed to antibiotics for the genetic determinants of resistance identified using CRISPRi<sup>a</sup>**

| Gene symbol | Colistin            |                                | LL37                |                                | CSA13               |                                | CSA131              |                                |
|-------------|---------------------|--------------------------------|---------------------|--------------------------------|---------------------|--------------------------------|---------------------|--------------------------------|
|             | Log <sub>2</sub> FC | Adj. <i>P</i> <sub>value</sub> | Log <sub>2</sub> FC | Adj. <i>P</i> <sub>value</sub> | Log <sub>2</sub> FC | Adj. <i>P</i> <sub>value</sub> | Log <sub>2</sub> FC | Adj. <i>P</i> <sub>value</sub> |
| <i>acpP</i> | -0.41               | <0.05                          | -0.31               | NS                             | 0.14                | NS                             | 0.15                | NS                             |
| <i>fabI</i> | 0.13                | NS                             | -0.11               | NS                             | -0.93               | <0.05                          | 0.17                | NS                             |
| <i>fabZ</i> | -0.13               | NS                             | 0.11                | NS                             | -1.03               | <0.05                          | 0.35                | NS                             |
| <i>kdsC</i> | 0.22                | NS                             | 0.05                | NS                             | 0.11                | NS                             | 0.06                | NS                             |
| <i>lptB</i> | 0.46                | NS                             | 0.63                | <0.05                          | -0.26               | NS                             | 0.26                | NS                             |
| <i>lptF</i> | 0.54                | <0.05                          | 0.48                | <0.05                          | 0.22                | NS                             | 0.34                | NS                             |
| <i>lpxB</i> | -0.35               | NS                             | -0.30               | NS                             | -2.69               | <0.05                          | -0.04               | NS                             |
| <i>mreB</i> | 0.09                | NS                             | 0.36                | NS                             | -0.44               | NS                             | 0.54                | NS                             |
| <i>rpoE</i> | 1.53                | <0.05                          | 1.68                | <0.05                          | 1.88                | <0.05                          | 1.92                | <0.05                          |
| <i>ubiJ</i> | -0.17               | NS                             | 0.66                | <0.05                          | 0.19                | NS                             | 0.06                | NS                             |
| <i>yejM</i> | -0.05               | NS                             | -0.25               | NS                             | -0.18               | NS                             | 0.43                | NS                             |

<sup>a</sup>Log<sub>2</sub>FC, Log<sub>2</sub> fold change; Adj. *P*<sub>value</sub>, adjusted *P*<sub>value</sub>; NS, not significant.
